# Supplementary material
Source: PubMed Central journal article supplement (PMC2586241)

## SUPPLEMENTAL FIGURE LEGENDS

**Figure 1S. The effects of CID755673 on tumor cell migration.** DU145 cells were seeded into the 24-well transwell inserts that contain filters with 8 micron pores. After 22 h incubation, cells that did not migrate through the pores were removed and the traversed cells were fixed, stained, and photographed under a microscope. Magnification, 200x. Number of migrated cells represents the total number of traversed cells in 10 random fields. The experiment was repeated twice and a representative one is shown. \*\*\*P<0.001.

**Figure 2S. CID755673 inhibited prostate cancer cell proliferation.** LNCaP cells were seeded in triplicate into 96-well plates and treated with varying concentrations of CID755673. Media containing fresh inhibitors were replenished every 24 h. The number of viable cells was measured after 72 h using the CellTiter-Glo Luminescent Cell Viability Assay. One of two independent experiments is shown. \*\*\*P<0.001.

Supplemental Figure 1S

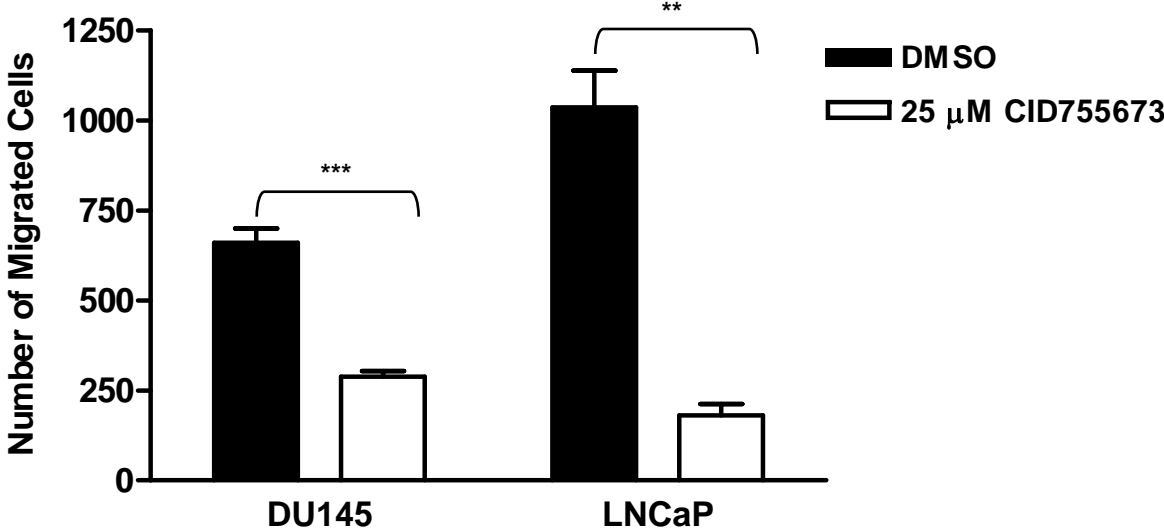

Supplemental Figure 2S

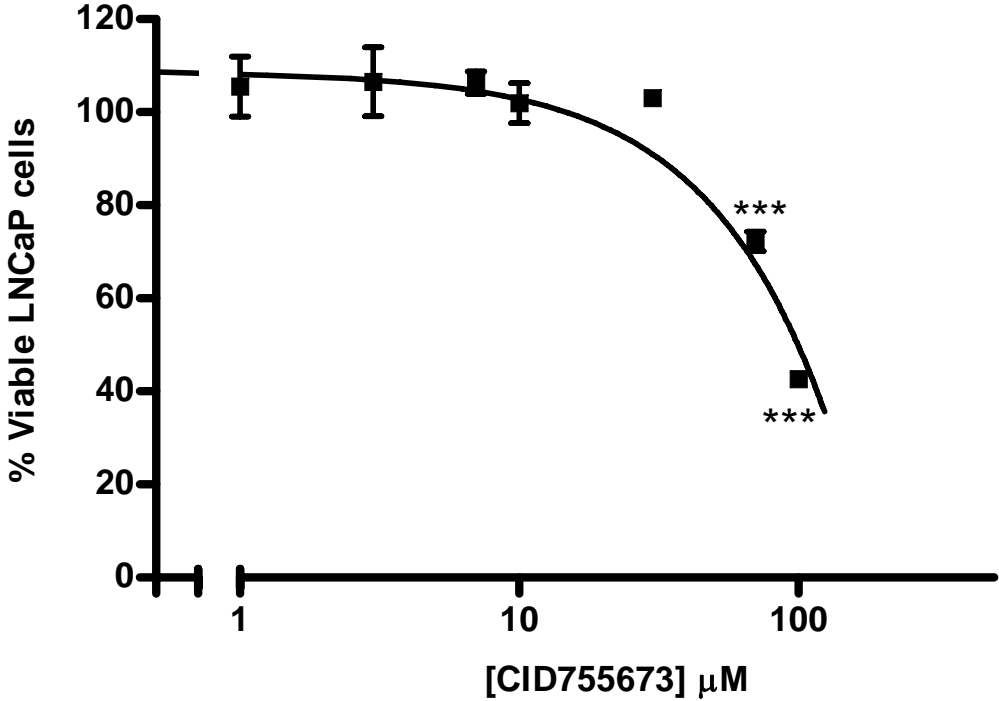

Supplement: M805358200_1.pdf [file M805358200_1.pdf]
